# Supplementary material for: Trends in Acute Myocardial Infarction by Race and Ethnicity
Source: PubMed Central journal article supplement — J Am Heart Assoc. 2020 Mar 2;9(5):e013542. doi: 10.1161/JAHA.119.013542 (PMC7335574; doi:10.1161/jaha.119.013542), 2020-03-02
Supplement: JAH3-9-e013542-s001.pdf [file JAH3-9-e013542-s001.pdf]

# **SUPPLEMENTAL MATERIAL**

**Table S1. Person-Years Contributed by Each Race/Ethnic Group by Year, Kaiser Permanente Southern California, 2000–2014.**

| Year  | Overall Person<br>-years | Hispanic         |    | Asian or Pacific Islander |    | Black        |    | White        |    | Multiple or Other |   |
|-------|--------------------------|------------------|----|---------------------------|----|--------------|----|--------------|----|-------------------|---|
|       |                          | Person-<br>years | %  | Person-years              | %  | Person-years | %  | Person-years | %  | Person-years      | % |
| 2000  | 933,256                  | 224,126          | 24 | 75,671                    | 8  | 128,240      | 14 | 495,152      | 53 | 10,067            | 1 |
| 2001  | 986,136                  | 249,245          | 25 | 81,805                    | 8  | 132,378      | 13 | 511,679      | 52 | 11,029            | 1 |
| 2002  | 1,041,102                | 275,438          | 26 | 88,452                    | 8  | 136,591      | 13 | 528,423      | 51 | 12,198            | 1 |
| 2003  | 1,078,067                | 294,148          | 27 | 93,585                    | 9  | 139,168      | 13 | 538,008      | 50 | 13,157            | 1 |
| 2004  | 1,107,510                | 310,661          | 28 | 98,447                    | 9  | 141,100      | 13 | 543,281      | 49 | 14,021            | 1 |
| 2005  | 1,158,747                | 337,893          | 29 | 105,156                   | 9  | 144,147      | 12 | 556,274      | 48 | 15,276            | 1 |
| 2006  | 1,210,185                | 365,433          | 30 | 112,790                   | 9  | 147,349      | 12 | 567,907      | 47 | 16,706            | 1 |
| 2007  | 1,243,319                | 384,901          | 31 | 119,090                   | 10 | 148,859      | 12 | 572,497      | 46 | 17,971            | 1 |
| 2008  | 1,279,658                | 405,411          | 32 | 125,993                   | 10 | 150,793      | 12 | 578,533      | 45 | 18,928            | 1 |
| 2009  | 1,313,135                | 422,749          | 32 | 133,500                   | 10 | 151,984      | 12 | 585,059      | 45 | 19,844            | 2 |
| 2010  | 1,360,965                | 443,671          | 33 | 142,723                   | 10 | 154,331      | 11 | 599,043      | 44 | 21,197            | 2 |
| 2011  | 1,413,077                | 467,385          | 33 | 152,513                   | 11 | 156,502      | 11 | 614,167      | 43 | 22,510            | 2 |
| 2012  | 1,461,685                | 491,191          | 34 | 161,471                   | 11 | 159,049      | 11 | 626,414      | 43 | 23,560            | 2 |
| 2013  | 1,495,212                | 510,262          | 34 | 168,216                   | 11 | 159,606      | 11 | 633,182      | 42 | 23,946            | 2 |
| 2014  | 1,548,722                | 538,299          | 35 | 176,042                   | 11 | 162,409      | 10 | 647,150      | 42 | 24,823            | 2 |
| Total | 18,630,776               | 5,720,813        | 31 | 1,835,454                 | 10 | 2,212,506    | 12 | 8,596,769    | 46 | 265,233           | 1 |

**Table S2. Characteristics of Persons Hospitalized for Non-ST-Segment Elevation Myocardial Infarction by Race/Ethnicity and Year, Kaiser Permanente Southern California, 2000–2014.\***

| Characteristics        | Overall           | Hispanic <sup>†</sup> | Asian or Pacific<br>Islander <sup>†</sup> | Black <sup>†</sup> | White <sup>†</sup> | Multiple/<br>Other <sup>†</sup> |
|------------------------|-------------------|-----------------------|-------------------------------------------|--------------------|--------------------|---------------------------------|
| <b>Years 2000–2004</b> |                   |                       |                                           |                    |                    |                                 |
| N (%)                  | 9792<br>(100.0%)  | 1512 (15.4%)          | 557 (5.7%)                                | 1269 (13.0%)       | 6417 (65.5%)       | 37 (0.4%)                       |
| Age (yrs), mean ± SD   | 69.8 ± 12.5       | 65.4 ± 12.7           | 66.6 ± 12.0                               | 67.1 ± 12.0        | 71.6 ± 12.1        | 64.4 ± 13.4                     |
| Age group (%)          |                   |                       |                                           |                    |                    |                                 |
| 35–54                  | 1266 (12.9%)      | 319 (21.1%)           | 101 (18.1%)                               | 206 (16.2%)        | 631 (9.8%)         | 9 (24.3%)                       |
| 55–74                  | 4662 (47.6%)      | 812 (53.7%)           | 311 (55.8%)                               | 682 (53.7%)        | 2837 (44.2%)       | 20 (54.1%)                      |
| ≥75                    | 3864 (39.5%)      | 381 (25.2%)           | 145 (26%)                                 | 381 (30%)          | 2949 (46%)         | 8 (21.6%)                       |
| Sex (%)                |                   |                       |                                           |                    |                    |                                 |
| Women                  | 3718 (38%)        | 532 (35.2%)           | 169 (30.3%)                               | 578 (45.5%)        | 2425 (37.8%)       | 14 (37.8%)                      |
| Men                    | 6074 (62%)        | 980 (64.8%)           | 388 (69.7%)                               | 691 (54.5%)        | 3992 (62.2%)       | 23 (62.2%)                      |
| <b>Years 2005–2009</b> |                   |                       |                                           |                    |                    |                                 |
| N (%)                  | 10575<br>(100.0%) | 2138 (20.2%)          | 736 (7.0%)                                | 1253 (11.8%)       | 6382 (60.3%)       | 66 (0.6%)                       |
| Age (yrs), mean ± SD   | 70.1 ± 12.7       | 66.5 ± 12.6           | 67.3 ± 11.9                               | 68.3 ± 12.6        | 71.9 ± 12.5        | 68.8 ± 12.7                     |
| Age group (%)          |                   |                       |                                           |                    |                    |                                 |
| 35–54                  | 1342 (12.7%)      | 406 (19%)             | 104 (14.1%)                               | 187 (14.9%)        | 635 (9.9%)         | 10 (15.2%)                      |

|                        |                   |              |             |              |              |             |
|------------------------|-------------------|--------------|-------------|--------------|--------------|-------------|
| 55–74                  | 4988 (47.2%)      | 1089 (50.9%) | 421 (57.2%) | 638 (50.9%)  | 2810 (44%)   | 30 (45.5%)  |
| ≥75                    | 4245 (40.1%)      | 643 (30.1%)  | 211 (28.7%) | 428 (34.2%)  | 2937 (46%)   | 26 (39.4%)  |
| <b>Sex (%)</b>         |                   |              |             |              |              |             |
| Women                  | 4165 (39.4%)      | 786 (36.8%)  | 228 (31%)   | 628 (50.1%)  | 2504 (39.2%) | 19 (28.8%)  |
| Men                    | 6410 (60.6%)      | 1352 (63.2%) | 508 (69%)   | 625 (49.9%)  | 3878 (60.8%) | 47 (71.2%)  |
| <b>Years 2010–2014</b> |                   |              |             |              |              |             |
| N (%)                  | 11487<br>(100.0%) | 2620 (22.8%) | 933 (8.1%)  | 1450 (12.6%) | 6407 (55.8%) | 77 (0.7%)   |
| Age (yrs), mean ± SD   | 70.7 ± 12.8       | 66.9 ± 13.3  | 67.9 ± 12.5 | 69.1 ± 12.6  | 73.1 ± 12.2  | 66.9 ± 14.2 |
| <b>Age group (%)</b>   |                   |              |             |              |              |             |
| 35–54                  | 1377 (12%)        | 513 (19.6%)  | 148 (15.9%) | 198 (13.7%)  | 500 (7.8%)   | 18 (23.4%)  |
| 55–74                  | 5305 (46.2%)      | 1273 (48.6%) | 490 (52.5%) | 728 (50.2%)  | 2784 (43.5%) | 30 (39%)    |
| ≥75                    | 4805 (41.8%)      | 834 (31.8%)  | 295 (31.6%) | 524 (36.1%)  | 3123 (48.7%) | 29 (37.7%)  |
| <b>Sex (%)</b>         |                   |              |             |              |              |             |
| Women                  | 4629 (40.3%)      | 1009 (38.5%) | 301 (32.3%) | 751 (51.8%)  | 2534 (39.6%) | 34 (44.2%)  |
| Men                    | 6858 (59.7%)      | 1611 (61.5%) | 632 (67.7%) | 699 (48.2%)  | 3873 (60.4%) | 43 (55.8%)  |

Abbreviations: SD, standard deviation.

\* Percentages might not add up to 100% because of rounding to the nearest tenth of a percent.

† Persons were categorized as Hispanic (regardless of race) or as one of the following non-Hispanic race groups: Asian or Pacific Islander (API), black, white, or multiple or other (multiple/other).

**Table S3. Characteristics of Persons Hospitalized for ST-Segment Elevation Myocardial Infarction by Race/Ethnicity and Year, Kaiser Permanente Southern California, 2000–2014.\***

| <b>Characteristics</b> | <b>Overall</b>   | <b>Hispanic<sup>†</sup></b> | <b>Asian or Pacific<br/>Islander<sup>†</sup></b> | <b>Black<sup>†</sup></b> | <b>White<sup>†</sup></b> | <b>Multiple/<br/>Other<sup>†</sup></b> |
|------------------------|------------------|-----------------------------|--------------------------------------------------|--------------------------|--------------------------|----------------------------------------|
| <b>Years 2000–2004</b> |                  |                             |                                                  |                          |                          |                                        |
| N (%)                  | 6682<br>(100.0%) | 1186 (17.7%)                | 365 (5.5%)                                       | 702 (10.5%)              | 4397 (65.8%)             | 32 (0.5%)                              |
| Age (yrs), mean ± SD   | 66.3 ± 12.4      | 62.2 ± 12.1                 | 62.6 ± 11.5                                      | 64.3 ± 11.8              | 68.1 ± 12.2              | 62.3 ± 13.1                            |
| Age group (%)          |                  |                             |                                                  |                          |                          |                                        |
| 35–54                  | 1280 (19.2%)     | 341 (28.8%)                 | 106 (29%)                                        | 157 (22.4%)              | 667 (15.2%)              | 9 (28.1%)                              |
| 55–74                  | 3544 (53%)       | 638 (53.8%)                 | 198 (54.2%)                                      | 402 (57.3%)              | 2289 (52.1%)             | 17 (53.1%)                             |
| ≥75                    | 1858 (27.8%)     | 207 (17.5%)                 | 61 (16.7%)                                       | 143 (20.4%)              | 1441 (32.8%)             | 6 (18.8%)                              |
| Sex (%)                |                  |                             |                                                  |                          |                          |                                        |
| Women                  | 2240 (33.5%)     | 311 (26.2%)                 | 80 (21.9%)                                       | 293 (41.7%)              | 1550 (35.3%)             | 6 (18.8%)                              |
| Men                    | 4442 (66.5%)     | 875 (73.8%)                 | 285 (78.1%)                                      | 409 (58.3%)              | 2847 (64.7%)             | 26 (81.3%)                             |
| <b>Years 2005–2009</b> |                  |                             |                                                  |                          |                          |                                        |
| N (%)                  | 5181<br>(100.0%) | 1059 (20.4%)                | 365 (7.0%)                                       | 482 (9.3%)               | 3238 (62.5%)             | 37 (0.7%)                              |
| Age (yrs), mean ± SD   | 66.0 ± 12.5      | 62.4 ± 12.4                 | 63.4 ± 11.8                                      | 65.1 ± 12.3              | 67.6 ± 12.4              | 65.3 ± 12.7                            |
| Age group (%)          |                  |                             |                                                  |                          |                          |                                        |
| 35–54                  | 1012 (19.5%)     | 308 (29.1%)                 | 81 (22.2%)                                       | 99 (20.5%)               | 515 (15.9%)              | 9 (24.3%)                              |

|                        |                  |             |               |               |                 |              |
|------------------------|------------------|-------------|---------------|---------------|-----------------|--------------|
| 55–74                  | 2754 (53.2%)     | 551 (52%)   | 222 (60.8%)   | 262 (54.4%)   | 1700 (52.5%)    | 19 (51.4%)   |
| ≥75                    | 1415 (27.3%)     | 200 (18.9%) | 62 (17%)      | 121 (25.1%)   | 1023 (31.6%)    | 9 (24.3%)    |
| Sex (%)                |                  |             |               |               |                 |              |
| Women                  | 1588 (30.7%)     | 278 (26.3%) | 78 (21.4%)    | 204 (42.3%)   | 1014 (31.3%)    | 14 (37.8%)   |
| Men                    | 3593 (69.3%)     | 781 (73.7%) | 287 (78.6%)   | 278 (57.7%)   | 2224 (68.7%)    | 23 (62.2%)   |
| <b>Years 2010–2014</b> |                  |             |               |               |                 |              |
| N (%)                  | 4136<br>(100.0%) | 984 (23.8%) | 352<br>(8.5%) | 388<br>(9.4%) | 2379<br>(57.5%) | 33<br>(0.8%) |
| Age (yrs), mean ± SD   | 66.8 ± 12.8      | 63.6 ± 12.4 | 64.3 ± 12.7   | 65.9 ± 12.5   | 68.8 ± 12.6     | 62.2 ± 10.7  |
| Age group (%)          |                  |             |               |               |                 |              |
| 35–54                  | 717 (17.3%)      | 245 (24.9%) | 79 (22.4%)    | 70 (18%)      | 318 (13.4%)     | 5 (15.2%)    |
| 55–74                  | 2171 (52.5%)     | 522 (53%)   | 187 (53.1%)   | 210 (54.1%)   | 1230 (51.7%)    | 22 (66.7%)   |
| ≥75                    | 1248 (30.2%)     | 217 (22.1%) | 86 (24.4%)    | 108 (27.8%)   | 831 (34.9%)     | 6 (18.2%)    |
| Sex (%)                |                  |             |               |               |                 |              |
| Women                  | 1304 (31.5%)     | 278 (28.3%) | 83 (23.6%)    | 167 (43%)     | 770 (32.4%)     | 6 (18.2%)    |
| Men                    | 2832 (68.5%)     | 706 (71.7%) | 269 (76.4%)   | 221 (57%)     | 1609 (67.6%)    | 27 (81.8%)   |

SD, standard deviation.

\* Percentages might not add up to 100% because of rounding to the nearest tenth of a percent.

† Persons were categorized as Hispanic (regardless of race) or as one of the following non-Hispanic race groups: Asian or Pacific Islander (API), black, white, or multiple or other (multiple/other).

**Table S4. Crude and Age- and Sex-standardized Incidence Rates of Acute Myocardial Infarction Hospitalizations per 100,000 Person-Years by Race/Ethnicity, Kaiser Permanente Southern California, 2000–2014.**

| Year | Overall       |             |                      |                                                   | Hispanic      |             |                      |                                                   | Asian or Pacific Islander |             |                      |                                                   |
|------|---------------|-------------|----------------------|---------------------------------------------------|---------------|-------------|----------------------|---------------------------------------------------|---------------------------|-------------|----------------------|---------------------------------------------------|
|      | No. of Events | Denominator | Crude Incidence Rate | Age- and Sex-standardized Incidence Rate (95% CI) | No. of Events | Denominator | Crude Incidence Rate | Age- and Sex-standardized Incidence Rate (95% CI) | No. of Events             | Denominator | Crude Incidence Rate | Age- and Sex-standardized Incidence Rate (95% CI) |
| 2000 | 2,974         | 933,256     | 319                  | 349 (337, 362)                                    | 441           | 224,126     | 197                  | 307 (275, 339)                                    | 161                       | 75,671      | 213                  | 271 (226, 316)                                    |
| 2001 | 3,073         | 986,136     | 312                  | 343 (331, 355)                                    | 500           | 249,245     | 201                  | 307 (277, 336)                                    | 170                       | 81,805      | 208                  | 269 (226, 314)                                    |
| 2002 | 3,036         | 1,041,102   | 292                  | 319 (307, 330)                                    | 512           | 275,438     | 186                  | 266 (241, 292)                                    | 157                       | 88,452      | 177                  | 239 (198, 279)                                    |
| 2003 | 3,020         | 1,078,067   | 280                  | 302 (291, 313)                                    | 546           | 294,148     | 186                  | 271 (246, 295)                                    | 186                       | 93,585      | 199                  | 240 (203, 276)                                    |
| 2004 | 3,056         | 1,107,510   | 276                  | 294 (284, 305)                                    | 527           | 310,661     | 170                  | 245 (223, 268)                                    | 196                       | 98,447      | 199                  | 237 (202, 272)                                    |
| 2005 | 2,971         | 1,158,747   | 256                  | 271 (261, 281)                                    | 556           | 337,893     | 165                  | 237 (216, 258)                                    | 177                       | 105,156     | 168                  | 198 (167, 229)                                    |
| 2006 | 2,997         | 1,210,185   | 248                  | 260 (251, 269)                                    | 614           | 365,433     | 168                  | 235 (215, 254)                                    | 201                       | 112,790     | 178                  | 213 (182, 244)                                    |
| 2007 | 2,859         | 1,243,319   | 230                  | 241 (232, 249)                                    | 572           | 384,901     | 149                  | 208 (190, 226)                                    | 227                       | 119,090     | 191                  | 220 (190, 250)                                    |
| 2008 | 2,912         | 1,279,658   | 228                  | 237 (228, 246)                                    | 591           | 405,411     | 146                  | 205 (187, 222)                                    | 215                       | 125,993     | 171                  | 190 (163, 216)                                    |
| 2009 | 2,788         | 1,313,135   | 212                  | 218 (209, 226)                                    | 626           | 422,749     | 148                  | 201 (184, 217)                                    | 201                       | 133,500     | 151                  | 168 (144, 192)                                    |
| 2010 | 2,829         | 1,360,965   | 208                  | 211 (203, 219)                                    | 609           | 443,671     | 137                  | 182 (167, 197)                                    | 224                       | 142,723     | 157                  | 174 (151, 197)                                    |
| 2011 | 2,978         | 1,413,077   | 211                  | 211 (203, 219)                                    | 679           | 467,385     | 145                  | 190 (175, 205)                                    | 240                       | 152,513     | 157                  | 172 (150, 194)                                    |
| 2012 | 2,872         | 1,461,685   | 196                  | 195 (188, 202)                                    | 688           | 491,191     | 140                  | 178 (164, 192)                                    | 227                       | 161,471     | 141                  | 155 (134, 175)                                    |
| 2013 | 2,918         | 1,495,212   | 195                  | 191 (184, 198)                                    | 652           | 510,262     | 128                  | 161 (149, 174)                                    | 254                       | 168,216     | 151                  | 163 (142, 183)                                    |

| 2014 | 2,859         | 1,548,722   | 185                  | 179 (172, 186)                                    | 711           | 538,299     | 132                  | 162 (149, 174)                                    | 266                      | 176,042     | 151                  | 158 (138, 177)                                    |
|------|---------------|-------------|----------------------|---------------------------------------------------|---------------|-------------|----------------------|---------------------------------------------------|--------------------------|-------------|----------------------|---------------------------------------------------|
|      |               |             |                      |                                                   |               |             |                      |                                                   |                          |             |                      |                                                   |
|      | <b>Black</b>  |             |                      |                                                   | <b>White</b>  |             |                      |                                                   | <b>Multiple or Other</b> |             |                      |                                                   |
| Year | No. of Events | Denominator | Crude Incidence Rate | Age- and Sex-standardized Incidence Rate (95% CI) | No. of Events | Denominator | Crude Incidence Rate | Age- and Sex-standardized Incidence Rate (95% CI) | No. of Events            | Denominator | Crude Incidence Rate | Age- and Sex-standardized Incidence Rate (95% CI) |
| 2000 | 377           | 128,240     | 294                  | 347 (311, 383)                                    | 1,982         | 495,152     | 400                  | 376 (359, 392)                                    | 13                       | 10,067      | 129                  | 232 (90, 375)                                     |
| 2001 | 358           | 132,378     | 270                  | 329 (294, 364)                                    | 2,032         | 511,679     | 397                  | 367 (351, 383)                                    | 13                       | 11,029      | 118                  | 195 (71, 319)                                     |
| 2002 | 330           | 136,591     | 242                  | 290 (258, 323)                                    | 2,015         | 528,423     | 381                  | 351 (335, 366)                                    | 22                       | 12,198      | 180                  | 268 (139, 396)                                    |
| 2003 | 376           | 139,168     | 270                  | 321 (288, 354)                                    | 1,902         | 538,008     | 354                  | 320 (306, 335)                                    | 10                       | 13,157      | 76                   | 122 (37, 206)                                     |
| 2004 | 370           | 141,100     | 262                  | 303 (272, 335)                                    | 1,951         | 543,281     | 359                  | 321 (307, 335)                                    | 12                       | 14,021      | 86                   | 121 (44, 198)                                     |
| 2005 | 344           | 144,147     | 239                  | 274 (244, 303)                                    | 1,872         | 556,274     | 337                  | 298 (285, 312)                                    | 22                       | 15,276      | 144                  | 248 (132, 364)                                    |
| 2006 | 338           | 147,349     | 229                  | 261 (232, 289)                                    | 1,829         | 567,907     | 322                  | 284 (271, 297)                                    | 15                       | 16,706      | 90                   | 143 (62, 223)                                     |
| 2007 | 313           | 148,859     | 210                  | 231 (205, 257)                                    | 1,727         | 572,497     | 302                  | 266 (253, 279)                                    | 20                       | 17,971      | 111                  | 180 (91, 270)                                     |
| 2008 | 328           | 150,793     | 218                  | 238 (212, 264)                                    | 1,755         | 578,533     | 303                  | 263 (250, 275)                                    | 23                       | 18,928      | 122                  | 217 (118, 316)                                    |
| 2009 | 274           | 151,984     | 180                  | 189 (167, 212)                                    | 1,661         | 585,059     | 284                  | 243 (231, 255)                                    | 26                       | 19,844      | 131                  | 198 (111, 285)                                    |
| 2010 | 334           | 154,331     | 216                  | 225 (200, 249)                                    | 1,640         | 599,043     | 274                  | 231 (219, 242)                                    | 22                       | 21,197      | 104                  | 178 (93, 264)                                     |
| 2011 | 347           | 156,502     | 222                  | 225 (201, 249)                                    | 1,689         | 614,167     | 275                  | 229 (217, 240)                                    | 23                       | 22,510      | 102                  | 163 (89, 237)                                     |
| 2012 | 325           | 159,049     | 204                  | 202 (180, 224)                                    | 1,609         | 626,414     | 257                  | 211 (201, 222)                                    | 23                       | 23,560      | 98                   | 157 (86, 229)                                     |
| 2013 | 350           | 159,606     | 219                  | 213 (191, 236)                                    | 1,635         | 633,182     | 258                  | 209 (199, 219)                                    | 27                       | 23,946      | 113                  | 122 (72, 172)                                     |
| 2014 | 340           | 162,409     | 209                  | 199 (177, 220)                                    | 1,524         | 647,150     | 235                  | 189 (179, 198)                                    | 18                       | 24,823      | 73                   | 99 (48, 151)                                      |





**Table S5. Acute Myocardial Infarction Hospitalizations per 100,000 Person-Years Among Women by Race/Ethnicity, Age Group, and Sex, Kaiser Permanente Southern California, 2000–2014.**

| Year (age yrs) | Hispanic      |                | Asian or Pacific Islander |                | Black         |                | White         |                | Multiple or Other |                |
|----------------|---------------|----------------|---------------------------|----------------|---------------|----------------|---------------|----------------|-------------------|----------------|
|                | No. of Events | Incidence Rate | No. of Events             | Incidence Rate | No. of Events | Incidence Rate | No. of Events | Incidence Rate | No. of Events     | Incidence Rate |
| (35–54)        |               |                |                           |                |               |                |               |                |                   |                |
| 2000           | 29            | 34             | 7                         | 26             | 33            | 72             | 69            | 53             | 1                 | 28             |
| 2001           | 30            | 32             | 7                         | 24             | 22            | 47             | 61            | 46             | 2                 | 52             |
| 2002           | 31            | 30             | 8                         | 26             | 24            | 50             | 52            | 39             | 2                 | 48             |
| 2003           | 25            | 23             | 10                        | 31             | 31            | 64             | 50            | 37             | 0                 | 0              |
| 2004           | 32            | 28             | 9                         | 27             | 33            | 69             | 43            | 33             | 2                 | 44             |
| 2005           | 33            | 27             | 4                         | 12             | 24            | 50             | 51            | 39             | 1                 | 20             |
| 2006           | 36            | 28             | 3                         | 8              | 24            | 49             | 47            | 36             | 0                 | 0              |
| 2007           | 28            | 21             | 3                         | 8              | 18            | 37             | 52            | 40             | 1                 | 18             |
| 2008           | 20            | 14             | 8                         | 20             | 19            | 39             | 49            | 38             | 0                 | 0              |
| 2009           | 32            | 22             | 7                         | 17             | 23            | 49             | 54            | 43             | 3                 | 49             |
| 2010           | 22            | 14             | 8                         | 19             | 22            | 47             | 39            | 31             | 2                 | 31             |
| 2011           | 36            | 23             | 10                        | 22             | 13            | 28             | 38            | 30             | 1                 | 15             |
| 2012           | 34            | 21             | 5                         | 10             | 22            | 48             | 43            | 34             | 0                 | 0              |
| 2013           | 35            | 21             | 7                         | 14             | 23            | 51             | 34            | 28             | 0                 | 0              |

|                |     |       |    |     |    |       |     |       |   |       |
|----------------|-----|-------|----|-----|----|-------|-----|-------|---|-------|
| 2014           | 46  | 26    | 10 | 20  | 20 | 45    | 26  | 21    | 2 | 27    |
|                |     |       |    |     |    |       |     |       |   |       |
| <b>(55-74)</b> |     |       |    |     |    |       |     |       |   |       |
| 2000           | 81  | 257   | 20 | 141 | 87 | 352   | 309 | 305   | 2 | 156   |
| 2001           | 84  | 243   | 21 | 134 | 90 | 350   | 320 | 303   | 0 | 0     |
| 2002           | 72  | 188   | 24 | 137 | 70 | 259   | 304 | 274   | 1 | 61    |
| 2003           | 92  | 220   | 36 | 189 | 80 | 284   | 301 | 260   | 1 | 54    |
| 2004           | 82  | 183   | 20 | 96  | 81 | 275   | 293 | 246   | 3 | 145   |
| 2005           | 74  | 151   | 25 | 110 | 75 | 245   | 273 | 221   | 4 | 172   |
| 2006           | 99  | 185   | 35 | 142 | 77 | 243   | 279 | 219   | 2 | 77    |
| 2007           | 103 | 180   | 29 | 109 | 78 | 240   | 262 | 201   | 2 | 70    |
| 2008           | 109 | 178   | 34 | 119 | 78 | 233   | 236 | 177   | 4 | 132   |
| 2009           | 109 | 166   | 20 | 65  | 67 | 194   | 239 | 174   | 2 | 62    |
| 2010           | 105 | 148   | 31 | 94  | 75 | 210   | 231 | 161   | 0 | 0     |
| 2011           | 123 | 161   | 32 | 90  | 87 | 235   | 258 | 173   | 3 | 79    |
| 2012           | 116 | 142   | 40 | 106 | 75 | 196   | 233 | 151   | 1 | 25    |
| 2013           | 105 | 120   | 39 | 98  | 78 | 199   | 231 | 146   | 6 | 147   |
| 2014           | 129 | 136   | 46 | 110 | 98 | 241   | 227 | 138   | 3 | 70    |
|                |     |       |    |     |    |       |     |       |   |       |
| <b>(≥75)</b>   |     |       |    |     |    |       |     |       |   |       |
| 2000           | 48  | 1,044 | 10 | 557 | 32 | 680   | 352 | 979   | 2 | 1,025 |
| 2001           | 30  | 567   | 13 | 628 | 52 | 1,014 | 410 | 1,084 | 2 | 962   |

|      |     |     |    |     |    |       |     |       |   |       |
|------|-----|-----|----|-----|----|-------|-----|-------|---|-------|
| 2002 | 40  | 658 | 23 | 987 | 49 | 891   | 399 | 1,007 | 1 | 442   |
| 2003 | 57  | 822 | 14 | 526 | 55 | 929   | 355 | 863   | 1 | 374   |
| 2004 | 57  | 733 | 21 | 697 | 66 | 1,049 | 381 | 899   | 1 | 334   |
| 2005 | 64  | 731 | 17 | 497 | 58 | 864   | 349 | 792   | 4 | 1,212 |
| 2006 | 70  | 714 | 25 | 652 | 56 | 781   | 353 | 777   | 1 | 270   |
| 2007 | 63  | 592 | 28 | 671 | 55 | 729   | 349 | 759   | 2 | 531   |
| 2008 | 73  | 633 | 25 | 542 | 66 | 826   | 353 | 754   | 4 | 1,006 |
| 2009 | 83  | 659 | 22 | 429 | 59 | 696   | 335 | 697   | 4 | 942   |
| 2010 | 72  | 520 | 22 | 388 | 49 | 541   | 326 | 655   | 6 | 1,295 |
| 2011 | 88  | 577 | 26 | 413 | 68 | 705   | 349 | 678   | 3 | 601   |
| 2012 | 82  | 488 | 27 | 390 | 69 | 674   | 346 | 653   | 4 | 733   |
| 2013 | 97  | 531 | 35 | 462 | 90 | 834   | 365 | 674   | 2 | 335   |
| 2014 | 114 | 573 | 31 | 370 | 60 | 523   | 355 | 635   | 5 | 753   |

**Table S6. Acute Myocardial Infarction Hospitalizations per 100,000 Person-Years Among Men by Race/Ethnicity, Age Group, and Sex, Kaiser Permanente Southern California, 2000–2014.**

| Year (age yrs) | Hispanic      |                | Asian or Pacific Islander |                | Black         |                | White         |                | Multiple or Other |                |
|----------------|---------------|----------------|---------------------------|----------------|---------------|----------------|---------------|----------------|-------------------|----------------|
|                | No. of Events | Incidence Rate | No. of Events             | Incidence Rate | No. of Events | Incidence Rate | No. of Events | Incidence Rate | No. of Events     | Incidence Rate |
| <b>(35–54)</b> |               |                |                           |                |               |                |               |                |                   |                |
| 2000           | 74            | 103            | 25                        | 134            | 43            | 142            | 206           | 183            | 2                 | 53             |
| 2001           | 85            | 106            | 31                        | 156            | 36            | 116            | 185           | 160            | 2                 | 49             |
| 2002           | 115           | 129            | 29                        | 137            | 38            | 120            | 197           | 167            | 5                 | 112            |
| 2003           | 107           | 113            | 42                        | 191            | 47            | 148            | 183           | 156            | 1                 | 21             |
| 2004           | 104           | 105            | 33                        | 146            | 36            | 113            | 189           | 162            | 1                 | 20             |
| 2005           | 102           | 94             | 27                        | 114            | 31            | 97             | 174           | 147            | 3                 | 56             |
| 2006           | 115           | 98             | 29                        | 115            | 41            | 126            | 183           | 153            | 3                 | 51             |
| 2007           | 94            | 77             | 28                        | 107            | 32            | 98             | 183           | 153            | 4                 | 65             |
| 2008           | 107           | 84             | 36                        | 131            | 39            | 120            | 165           | 139            | 1                 | 16             |
| 2009           | 105           | 80             | 33                        | 114            | 18            | 56             | 141           | 120            | 3                 | 45             |
| 2010           | 120           | 89             | 40                        | 130            | 33            | 104            | 143           | 121            | 5                 | 71             |
| 2011           | 99            | 71             | 34                        | 103            | 36            | 114            | 132           | 111            | 0                 | 0              |
| 2012           | 112           | 78             | 34                        | 98             | 22            | 70             | 113           | 95             | 1                 | 13             |
| 2013           | 94            | 64             | 38                        | 106            | 25            | 81             | 106           | 90             | 9                 | 119            |

|                |     |       |     |       |     |       |     |       |    |       |
|----------------|-----|-------|-----|-------|-----|-------|-----|-------|----|-------|
| 2014           | 122 | 80    | 36  | 97    | 31  | 102   | 99  | 84    | 6  | 78    |
|                |     |       |     |       |     |       |     |       |    |       |
| <b>(55–74)</b> |     |       |     |       |     |       |     |       |    |       |
| 2000           | 159 | 567   | 79  | 660   | 137 | 707   | 651 | 733   | 4  | 345   |
| 2001           | 189 | 611   | 72  | 546   | 114 | 576   | 627 | 676   | 6  | 459   |
| 2002           | 203 | 595   | 54  | 371   | 111 | 542   | 672 | 689   | 10 | 663   |
| 2003           | 210 | 567   | 60  | 383   | 109 | 516   | 591 | 582   | 6  | 349   |
| 2004           | 178 | 447   | 94  | 557   | 112 | 517   | 625 | 600   | 4  | 209   |
| 2005           | 203 | 467   | 79  | 432   | 108 | 485   | 638 | 592   | 6  | 282   |
| 2006           | 220 | 465   | 76  | 381   | 87  | 378   | 600 | 540   | 5  | 211   |
| 2007           | 205 | 408   | 110 | 521   | 97  | 417   | 544 | 480   | 6  | 230   |
| 2008           | 191 | 356   | 94  | 419   | 84  | 353   | 553 | 474   | 9  | 320   |
| 2009           | 217 | 378   | 93  | 389   | 75  | 307   | 542 | 451   | 11 | 362   |
| 2010           | 190 | 308   | 87  | 341   | 103 | 411   | 505 | 403   | 6  | 180   |
| 2011           | 231 | 349   | 101 | 372   | 100 | 389   | 517 | 397   | 11 | 301   |
| 2012           | 234 | 329   | 70  | 245   | 93  | 350   | 496 | 367   | 12 | 305   |
| 2013           | 221 | 291   | 95  | 317   | 76  | 281   | 541 | 388   | 10 | 243   |
| 2014           | 209 | 255   | 100 | 321   | 82  | 294   | 481 | 332   | 2  | 46    |
|                |     |       |     |       |     |       |     |       |    |       |
| <b>(≥75)</b>   |     |       |     |       |     |       |     |       |    |       |
| 2000           | 50  | 1,373 | 20  | 1,282 | 45  | 1,403 | 395 | 1,535 | 2  | 1,298 |
| 2001           | 82  | 1,999 | 26  | 1,485 | 44  | 1,298 | 429 | 1,599 | 1  | 639   |

|      |     |       |    |       |    |       |     |       |   |       |
|------|-----|-------|----|-------|----|-------|-----|-------|---|-------|
| 2002 | 51  | 1,087 | 19 | 981   | 38 | 1,073 | 391 | 1,404 | 3 | 1,732 |
| 2003 | 55  | 1,029 | 24 | 1,086 | 54 | 1,459 | 422 | 1,470 | 1 | 538   |
| 2004 | 74  | 1,229 | 19 | 768   | 42 | 1,080 | 420 | 1,417 | 1 | 461   |
| 2005 | 80  | 1,172 | 25 | 901   | 48 | 1,158 | 387 | 1,250 | 4 | 1,586 |
| 2006 | 74  | 966   | 33 | 1,068 | 53 | 1,221 | 367 | 1,140 | 4 | 1,440 |
| 2007 | 79  | 958   | 29 | 858   | 33 | 726   | 337 | 1,031 | 5 | 1,667 |
| 2008 | 91  | 1,021 | 18 | 482   | 42 | 873   | 399 | 1,190 | 5 | 1,577 |
| 2009 | 80  | 826   | 26 | 625   | 32 | 625   | 350 | 1,009 | 3 | 877   |
| 2010 | 100 | 943   | 36 | 780   | 52 | 932   | 396 | 1,098 | 3 | 797   |
| 2011 | 102 | 885   | 37 | 727   | 43 | 717   | 395 | 1,056 | 5 | 1,255 |
| 2012 | 110 | 883   | 51 | 904   | 44 | 689   | 378 | 977   | 5 | 1,149 |
| 2013 | 100 | 742   | 40 | 645   | 58 | 866   | 358 | 902   | 0 | 0     |
| 2014 | 91  | 618   | 43 | 627   | 49 | 690   | 336 | 818   | 0 | 0     |

**Table S7. Crude and Standardized Age- and Sex-standardized Incidence of Non-ST-Segment Elevation Myocardial Infarction (NSTEMI)**

**Hospitalizations per 100,000 Person-Years by Race/Ethnicity, Kaiser Permanente Southern California, 2000–2014.**

| Year | Overall       |             |                      |                                  | Hispanic      |             |                      |                                  | Asian or Pacific Islander |             |                      |                                  |
|------|---------------|-------------|----------------------|----------------------------------|---------------|-------------|----------------------|----------------------------------|---------------------------|-------------|----------------------|----------------------------------|
|      | No. of Events | Denominator | Crude Incidence Rate | Adjusted Incidence Rate (95% CI) | No. of Events | Denominator | Crude Incidence Rate | Adjusted Incidence Rate (95% CI) | No. of Events             | Denominator | Crude Incidence Rate | Adjusted Incidence Rate (95% CI) |
| 2000 | 1,861         | 934,766     | 199                  | 219 (209, 229)                   | 253           | 224,001     | 113                  | 181 (156, 206)                   | 87                        | 75,498      | 115                  | 154 (119, 190)                   |
| 2001 | 1,972         | 986,762     | 200                  | 222 (212, 231)                   | 294           | 248,940     | 118                  | 187 (164, 211)                   | 102                       | 81,521      | 125                  | 170 (134, 206)                   |
| 2002 | 1,954         | 1,041,324   | 188                  | 206 (197, 216)                   | 313           | 274,967     | 114                  | 173 (152, 195)                   | 105                       | 88,184      | 119                  | 164 (130, 199)                   |
| 2003 | 1,979         | 1,078,599   | 183                  | 199 (190, 208)                   | 328           | 293,690     | 112                  | 174 (153, 194)                   | 122                       | 93,230      | 131                  | 154 (125, 183)                   |
| 2004 | 2,026         | 1,108,149   | 183                  | 196 (188, 205)                   | 324           | 310,184     | 104                  | 158 (140, 177)                   | 141                       | 98,138      | 144                  | 181 (149, 213)                   |
| 2005 | 2,055         | 1,158,916   | 177                  | 188 (180, 196)                   | 376           | 337,232     | 111                  | 169 (150, 187)                   | 120                       | 104,781     | 115                  | 139 (112, 165)                   |
| 2006 | 2,104         | 1,210,065   | 174                  | 183 (175, 191)                   | 449           | 364,682     | 123                  | 183 (165, 201)                   | 140                       | 112,447     | 125                  | 151 (125, 178)                   |



|      |              |           |     |                |              |         |     |                |                          |         |     |                |
|------|--------------|-----------|-----|----------------|--------------|---------|-----|----------------|--------------------------|---------|-----|----------------|
| 2007 | 2,076        | 1,242,838 | 167 | 175 (168, 183) | 409          | 383,987 | 107 | 156 (140, 172) | 173                      | 118,716 | 146 | 174 (147, 201) |
| 2008 | 2,205        | 1,278,910 | 172 | 180 (172, 187) | 453          | 404,313 | 112 | 160 (144, 176) | 161                      | 125,572 | 128 | 144 (121, 167) |
| 2009 | 2,135        | 1,311,750 | 163 | 167 (160, 174) | 451          | 421,489 | 107 | 152 (137, 166) | 142                      | 133,066 | 107 | 120 (100, 141) |
| 2010 | 2,198        | 1,359,334 | 162 | 164 (157, 171) | 455          | 442,296 | 103 | 139 (126, 152) | 181                      | 142,262 | 127 | 142 (121, 163) |
| 2011 | 2,359        | 1,410,960 | 167 | 167 (161, 174) | 541          | 465,914 | 116 | 156 (142, 170) | 175                      | 151,958 | 115 | 125 (106, 144) |
| 2012 | 2,301        | 1,459,373 | 158 | 156 (150, 163) | 544          | 489,528 | 111 | 145 (132, 158) | 190                      | 160,947 | 118 | 129 (110, 148) |
| 2013 | 2,326        | 1,492,845 | 156 | 153 (146, 159) | 514          | 508,594 | 101 | 130 (119, 142) | 191                      | 167,638 | 114 | 124 (106, 142) |
| 2014 | 2,303        | 1,546,152 | 149 | 144 (138, 150) | 566          | 536,477 | 106 | 132 (120, 143) | 196                      | 175,485 | 112 | 116 (100, 133) |
|      |              |           |     |                |              |         |     |                |                          |         |     |                |
|      |              |           |     |                |              |         |     |                |                          |         |     |                |
|      | <b>Black</b> |           |     |                | <b>White</b> |         |     |                | <b>Multiple or Other</b> |         |     |                |

| Year | No. of Events | Denominator | Crude Incidence Rate | Adjusted Incidence Rate (95% CI) | No. of Events | Denominator | Crude Incidence Rate | Adjusted Incidence Rate (95% CI) | No. of Events | Denominator | Crude Incidence Rate | Adjusted Incidence Rate (95% CI) |
|------|---------------|-------------|----------------------|----------------------------------|---------------|-------------|----------------------|----------------------------------|---------------|-------------|----------------------|----------------------------------|
| 2000 | 258           | 128,200     | 201                  | 240 (210, 271)                   | 1,257         | 497,039     | 253                  | 234 (221, 247)                   | 6             | 10,028      | 60                   | 108 (14, 202)                    |
| 2001 | 245           | 132,286     | 185                  | 232 (202, 263)                   | 1,325         | 513,032     | 258                  | 236 (223, 249)                   | 6             | 10,983      | 55                   | 111 (9, 213)                     |
| 2002 | 238           | 136,378     | 175                  | 212 (185, 240)                   | 1,287         | 529,645     | 243                  | 219 (207, 231)                   | 11            | 12,149      | 91                   | 131 (42, 219)                    |
| 2003 | 265           | 138,961     | 191                  | 230 (201, 258)                   | 1,260         | 539,622     | 233                  | 208 (196, 219)                   | 4             | 13,096      | 31                   | 49 (0, 104)                      |
| 2004 | 263           | 140,882     | 187                  | 224 (196, 252)                   | 1,288         | 544,980     | 236                  | 207 (196, 219)                   | 10            | 13,966      | 72                   | 97 (30, 163)                     |
| 2005 | 255           | 143,866     | 177                  | 209 (183, 235)                   | 1,293         | 557,834     | 232                  | 202 (191, 213)                   | 11            | 15,204      | 72                   | 120 (40, 200)                    |
| 2006 | 251           | 147,045     | 171                  | 196 (171, 221)                   | 1,254         | 569,262     | 220                  | 191 (180, 202)                   | 10            | 16,628      | 60                   | 97 (31, 164)                     |
| 2007 | 244           | 148,503     | 164                  | 180 (157, 203)                   | 1,238         | 573,743     | 216                  | 187 (176, 198)                   | 12            | 17,888      | 67                   | 119 (43, 195)                    |
| 2008 | 269           | 150,481     | 179                  | 197 (173, 221)                   | 1,303         | 579,712     | 225                  | 190 (179, 200)                   | 19            | 18,832      | 101                  | 182 (91, 273)                    |
| 2009 | 234           | 151,533     | 154                  | 164 (143, 186)                   | 1,294         | 585,904     | 221                  | 185 (175, 196)                   | 14            | 19,757      | 71                   | 133 (55, 211)                    |
| 2010 | 281           | 153,846     | 183                  | 190 (167, 212)                   | 1,265         | 599,844     | 211                  | 173 (163, 183)                   | 16            | 21,086      | 76                   | 148 (66, 229)                    |
| 2011 | 291           | 155,957     | 187                  | 189 (167, 211)                   | 1,337         | 614,732     | 217                  | 178 (168, 187)                   | 15            | 22,399      | 67                   | 125 (55, 195)                    |
| 2012 | 280           | 158,485     | 177                  | 174 (154, 195)                   | 1,273         | 626,972     | 203                  | 164 (155, 174)                   | 14            | 23,441      | 60                   | 105 (45, 165)                    |
| 2013 | 305           | 159,058     | 192                  | 187 (165, 208)                   | 1,300         | 633,717     | 205                  | 164 (155, 173)                   | 16            | 23,838      | 67                   | 72 (34, 111)                     |
| 2014 | 293           | 161,785     | 181                  | 171 (151, 191)                   | 1,232         | 647,695     | 190                  | 150 (141, 158)                   | 16            | 24,710      | 65                   | 99 (44, 153)                     |



| Year | Black         |             |                      |                                      | White         |             |                      |                                      | Multiple or Other |             |                      |                                      |
|------|---------------|-------------|----------------------|--------------------------------------|---------------|-------------|----------------------|--------------------------------------|-------------------|-------------|----------------------|--------------------------------------|
|      | No. of Events | Denominator | Crude Incidence Rate | Standardized Incidence Rate (95% CI) | No. of Events | Denominator | Crude Incidence Rate | Standardized Incidence Rate (95% CI) | No. of Events     | Denominator | Crude Incidence Rate | Standardized Incidence Rate (95% CI) |
| 2000 | 150           | 129,108     | 116                  | 133 (111, 155)                       | 929           | 499,543     | 186                  | 175 (164, 186)                       | 9                 | 10,097      | 89                   | 146 (34, 257)                        |
| 2001 | 153           | 133,317     | 115                  | 131 (110, 153)                       | 882           | 516,549     | 171                  | 158 (148, 169)                       | 5                 | 11,066      | 45                   | 51 (4, 97)                           |
| 2002 | 123           | 137,585     | 89                   | 106 (87, 126)                        | 916           | 533,715     | 172                  | 159 (148, 169)                       | 10                | 12,243      | 82                   | 125 (35, 216)                        |
| 2003 | 143           | 140,237     | 102                  | 120 (99, 140)                        | 832           | 543,745     | 153                  | 139 (130, 149)                       | 6                 | 13,200      | 45                   | 73 (8, 137)                          |
| 2004 | 133           | 142,260     | 93                   | 102 (84, 119)                        | 838           | 549,245     | 153                  | 137 (128, 147)                       | 2                 | 14,063      | 14                   | 25 (0, 65)                           |
| 2005 | 117           | 145,397     | 80                   | 89 (72, 105)                         | 730           | 562,569     | 130                  | 117 (108, 125)                       | 12                | 15,325      | 78                   | 128 (46, 209)                        |
| 2006 | 112           | 148,639     | 75                   | 83 (68, 99)                          | 739           | 574,493     | 129                  | 114 (106, 123)                       | 4                 | 16,765      | 24                   | 41 (0, 86)                           |
| 2007 | 105           | 150,220     | 70                   | 78 (63, 93)                          | 650           | 579,330     | 112                  | 100 (92, 107)                        | 7                 | 18,030      | 39                   | 57 (11, 104)                         |
| 2008 | 82            | 152,236     | 54                   | 57 (45, 70)                          | 616           | 585,672     | 105                  | 94 (86, 101)                         | 5                 | 18,990      | 26                   | 39 (0, 78)                           |
| 2009 | 66            | 153,514     | 43                   | 44 (33, 54)                          | 503           | 592,644     | 85                   | 74 (68, 81)                          | 9                 | 19,920      | 45                   | 49 (14, 85)                          |
| 2010 | 84            | 155,950     | 54                   | 56 (44, 68)                          | 525           | 607,025     | 86                   | 76 (70, 83)                          | 5                 | 21,284      | 23                   | 32 (0, 65)                           |
| 2011 | 85            | 158,212     | 54                   | 54 (43, 66)                          | 487           | 622,644     | 78                   | 66 (60, 72)                          | 11                | 22,608      | 49                   | 70 (24, 116)                         |
| 2012 | 70            | 160,878     | 44                   | 44 (33, 54)                          | 466           | 635,377     | 73                   | 61 (55, 67)                          | 5                 | 23,669      | 21                   | 28 (0, 56)                           |
| 2013 | 79            | 161,574     | 49                   | 48 (37, 58)                          | 470           | 642,611     | 73                   | 60 (54, 65)                          | 9                 | 24,070      | 37                   | 43 (12, 73)                          |
| 2014 | 70            | 164,538     | 43                   | 41 (31, 51)                          | 431           | 657,079     | 66                   | 54 (48, 59)                          | 3                 | 24,963      | 12                   | 12 (0, 25)                           |

**Figure S1. Acute Myocardial Infarction (AMI) Hospitalizations per 100,000 Person-Years by Length of Time in Membership, Standardized to the 2010 United States Census by Age and Sex, Kaiser Permanente Southern California, 2000–2014.**

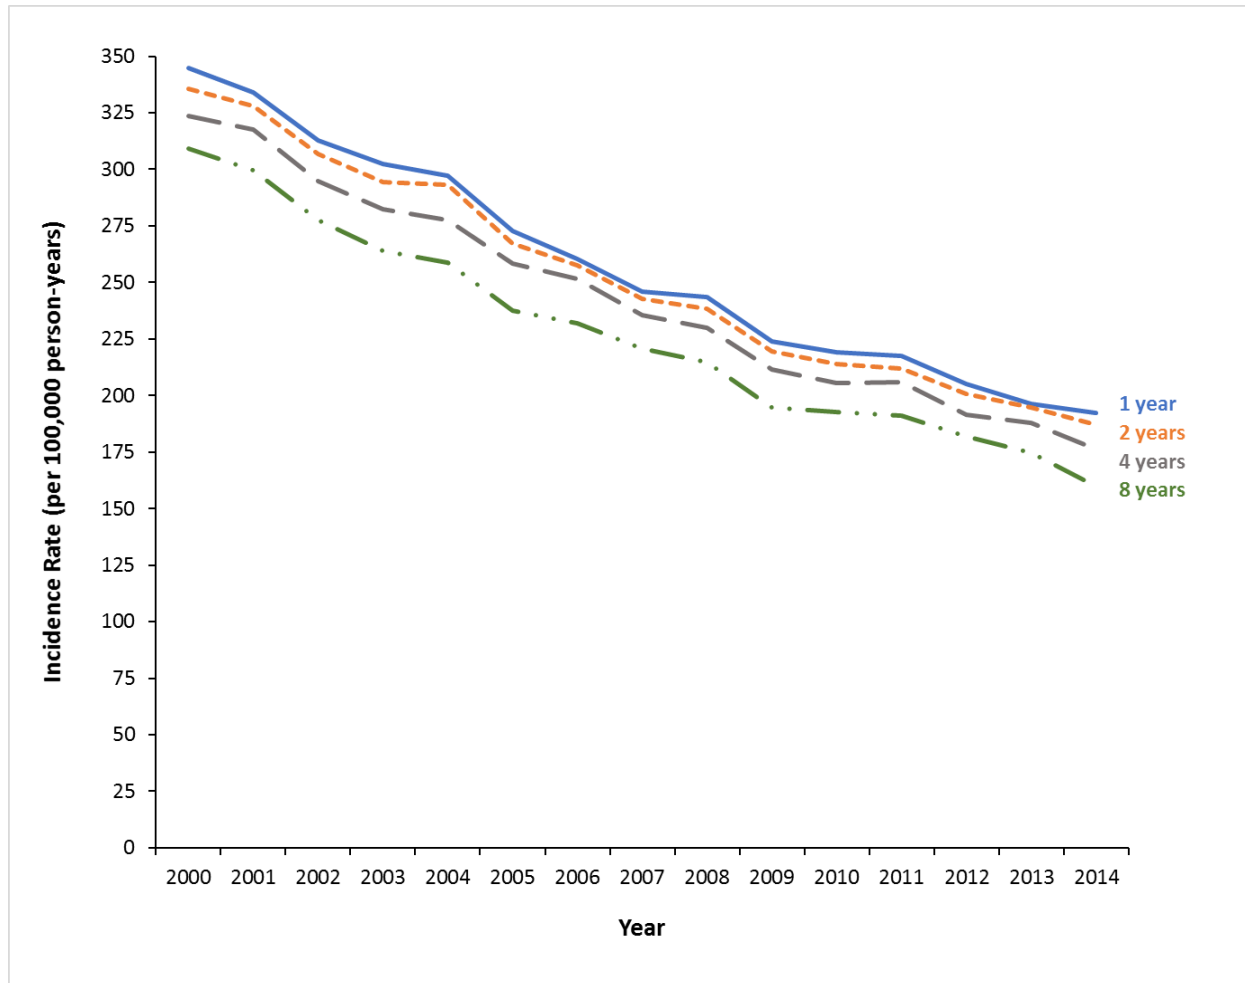

AMI hospitalizations, using time in membership (1, 2, 4, and 8 years) requirements, were compared. Trends in the decline of AMI hospitalizations were similar; however, estimated incidence rates were different because this figure includes persons missing race/ethnicity data who were excluded in the main analysis
